# Supplementary material for: A defect pyrochlore-like acentric cubic lead titanium-tellurate crystal exhibiting strong second harmonic generation activity and an extended transparent window
Source: Royal Society of Chemistry journal article supplement (doi:10.1039/d4qi01931h), 2024-01-01
Supplement: d4qi01931h1.pdf [file d4qi01931h1.pdf]

## Supporting Information

A defect pyrochlore-like acentric cubic lead titanium–tellurate crystal exhibiting strong second harmonic generation activity and an extended transparent window

*Tinghui Zhang,<sup>a</sup> Lili Li,<sup>c</sup> Jing Chai,<sup>a</sup> Haitao Zhou,<sup>\*,b</sup> Ning Ye,<sup>a</sup> Zhanggui Hu,<sup>a</sup> Yicheng Wu<sup>a</sup> and Conggang Li<sup>\*,a,c</sup>*

*<sup>a</sup>Tianjin Key Laboratory of Functional Crystal Materials, Institute of Functional Crystal, Tianjin University of Technology, Tianjin 300384, China.*

*<sup>b</sup>Guangxi Key Laboratory of Superhard Material, China Nonferrous Metal (Guilin) Geology and Mining Co., Ltd., Guilin, Guangxi 541004, China.*

*<sup>c</sup>State Key Laboratory of Crystal Materials and Institute of Crystal Materials, Shandong University, Jinan 250100, China.*

**\*Corresponding author:** E-mail address: cgli@email.tjut.edu.cn; zhouht@aliyun.com

- 1. Flexibility Index ( $F$ ) of Computational Methods.**
- 2. Table S1.** Crystallographic data and structural refinement for  $\text{Pb}_4\text{Ti}_3\text{TeO}_{13}$ .
- 3. Table S2.** Selected bond lengths ( $\text{\AA}$ ) and angles (deg.) for  $\text{Pb}_4\text{Ti}_3\text{TeO}_{13}$ .
- 4. Table S3.** Atomic coordinates ( $\times 10^4$ ) and equivalent isotropic displacement parameters ( $\text{\AA}^2 \times 10^3$ ) as well as atomic occupancy factors for  $\text{Pb}_4\text{Ti}_3\text{TeO}_{13}$ .  $U_{eq}$  is defined as one-third of the trace of the orthogonalized  $U_{ij}$  tensor, and the bond valence sum for each atom in asymmetric unit.
- 5. Table S4.** Anisotropic displacement parameters ( $\text{\AA}^2 \times 10^3$ ) for  $\text{Pb}_4\text{Ti}_3\text{TeO}_{13}$ .
- 6. Table S5.** The calculated “flexibility index”  $F$  of  $\text{Pb}_4\text{Ti}_3\text{TeO}_{13}$  and  $\text{Li}_2\text{ZrTeO}_6$ .
- 7. Fig. S1** PXRD curves of the initial and melted  $\text{Pb}_4\text{Ti}_3\text{TeO}_{13}$  compound compared with the corresponding calculated data.
- 8. Fig. S2** EDS of  $\text{Pb}_4\text{Ti}_3\text{TeO}_{13}$  (a) Atomic ratio of various elements. (b) Surface

morphology. (c–f) Ti, Te, Pb, and O mapping results, respectively.

9. **Fig. S3** SHG intensity comparison of PTTO with the AgGaS<sub>2</sub> reference at 2  $\mu\text{m}$ .

## 1. Flexibility Index ( $F$ ) of Computational Methods.

$F$  associated with the bonding electrons can be defined as the follows:

$$F = \frac{\exp [(R_0 - R_a) / B]}{(\sqrt{C_a} + \sqrt{C_b})^2 / R_a^2}$$

the numerator represents the bond valence electron charge, while the denominator denotes the binding force between the bond electron and the nucleus. The term  $R_a$  represents the average bond length of the target group.  $R_0$  denotes the standard bond length when an atom contributes precisely one unit of valence to the central atom of the group. The value of  $B$  is an empirical constant, typically 0.37 Å. The  $C_a$  (and  $C_b$ ) of Ti, O and Zr are 4, 6 and 4, respectively.

**Table S1** Crystallographic data and structural refinement for  $\text{Pb}_4\text{Ti}_3\text{TeO}_{13}$ .

|                                                                                                                           |                                         |
|---------------------------------------------------------------------------------------------------------------------------|-----------------------------------------|
| empirical formula                                                                                                         | $\text{Pb}_4\text{Ti}_3\text{TeO}_{13}$ |
| formula weight                                                                                                            | 654.04                                  |
| Crystal system                                                                                                            | Cubic                                   |
| Space group                                                                                                               | $F\bar{4}3m$                            |
| $a$ (Å)                                                                                                                   | 10.3488(2)                              |
| $b$ (Å)                                                                                                                   | 10.3488(2)                              |
| $c$ (Å)                                                                                                                   | 10.3488(2)                              |
| Volume (Å <sup>3</sup> )                                                                                                  | 1108.33(6)                              |
| $Z$                                                                                                                       | 8                                       |
| density (g/cm <sup>3</sup> )                                                                                              | 7.839                                   |
| $F$ (000)                                                                                                                 | 2200                                    |
| $R$ (int)                                                                                                                 | 0.05                                    |
| completeness                                                                                                              | 100.0 %                                 |
| GOF on ( $F^2$ )                                                                                                          | 1.177                                   |
| final $R$ indices [ $F_o^2 > 2\sigma(F_o^2)$ ] <sup>a</sup>                                                               | $R_1 = 0.0190, wR_2 = 0.0496$           |
| $R$ indices (all data)                                                                                                    | $R_1 = 0.0191, wR_2 = 0.0501$           |
| Flack factor                                                                                                              | 0.20(5)                                 |
| CCDC number                                                                                                               | 2374242                                 |
| <sup>a</sup> $R_1 = \Sigma  F_o  -  F_c   / \Sigma F_o $ ; $wR_2 = [\Sigma w(F_o^2 - F_c^2)^2 / \Sigma w(F_o^2)^2]^{1/2}$ |                                         |

**Table S2** Selected bond lengths (Å) and angles (deg.) for Pb<sub>4</sub>Ti<sub>3</sub>TeO<sub>13</sub>.

|                     |           |                       |           |
|---------------------|-----------|-----------------------|-----------|
| Pb(1)-O(1)          | 2.283(2)  | Ti(1)-O(2)#10         | 1.948(5)  |
| Pb(1)-O(3)#1        | 2.631(5)  | Ti(1)-O(2)#11         | 1.948(5)  |
| Pb(1)-O(3)#2        | 2.631(5)  | Ti(1)-O(2)#12         | 1.948(5)  |
| Pb(1)-O(3)#3        | 2.631(5)  | Ti(1)-O(3)#13         | 1.961(4)  |
| Pb(1)-O(2)#4        | 2.644(6)  | Ti(1)-O(3)#14         | 1.961(4)  |
| Pb(1)-O(2)#5        | 2.644(6)  | Ti(1)-O(3)            | 1.961(4)  |
| Pb(1)-O(2)#6        | 2.644(6)  | Te(1)-O(3)#13         | 1.961(4)  |
| Te(1)-O(2)#10       | 1.948(5)  | Te(1)-O(3)#14         | 1.961(4)  |
| Te(1)-O(2)#11       | 1.948(5)  | Te(1)-O(3)            | 1.961(4)  |
| Te(1)-O(2)#12       | 1.948(5)  | O(2)#11-Te(1)-O(3)#13 | 179.0(4)  |
| O(1)-Pb(1)-O(3)#1   | 80.15(13) | O(2)#12-Te(1)-O(3)#13 | 88.41(18) |
| O(1)-Pb(1)-O(3)#2   | 80.15(13) | O(2)#10-Te(1)-O(3)#14 | 88.41(18) |
| O(3)#1-Pb(1)-O(3)#2 | 117.14(7) | O(2)#11-Te(1)-O(3)#14 | 88.41(18) |
| O(1)-Pb(1)-O(3)#3   | 80.15(13) | O(2)#12-Te(1)-O(3)#14 | 179.0(4)  |
| O(3)#1-Pb(1)-O(3)#3 | 117.14(7) | O(3)#13-Te(1)-O(3)#14 | 92.3(4)   |
| O(3)#2-Pb(1)-O(3)#3 | 117.14(7) | O(2)#10-Te(1)-O(3)    | 179.0(4)  |
| O(1)-Pb(1)-O(2)#4   | 97.48(12) | O(2)#11-Te(1)-O(3)    | 88.41(18) |
| O(3)#1-Pb(1)-O(2)#4 | 62.21(4)  | O(2)#12-Te(1)-O(3)    | 88.41(18) |
| O(3)#2-Pb(1)-O(2)#4 | 62.21(4)  | O(3)#13-Te(1)-O(3)    | 92.3(4)   |
| O(3)#3-Pb(1)-O(2)#4 | 177.6(2)  | O(3)#14-Te(1)-O(3)    | 92.3(4)   |
| O(1)-Pb(1)-O(2)#5   | 97.48(12) | O(2)#10-Ti(1)-O(2)#11 | 90.9(3)   |
| O(3)#1-Pb(1)-O(2)#5 | 62.21(4)  | O(2)#10-Ti(1)-O(2)#12 | 90.9(3)   |
| O(3)#2-Pb(1)-O(2)#5 | 177.6(2)  | O(2)#11-Ti(1)-O(2)#12 | 90.9(3)   |
| O(3)#3-Pb(1)-O(2)#5 | 62.21(4)  | O(2)#10-Ti(1)-O(3)#13 | 88.41(18) |
| O(2)#4-Pb(1)-O(2)#5 | 118.33(5) | O(2)#11-Ti(1)-O(3)#13 | 179.0(4)  |
| O(1)-Pb(1)-O(2)#6   | 97.48(12) | O(2)#12-Ti(1)-O(3)#13 | 88.41(18) |
| O(3)#1-Pb(1)-O(2)#6 | 177.6(2)  | O(2)#10-Ti(1)-O(3)#14 | 88.41(18) |
| O(3)#2-Pb(1)-O(2)#6 | 62.21(4)  | O(2)#11-Ti(1)-O(3)#14 | 88.41(18) |

|                       |           |                       |           |
|-----------------------|-----------|-----------------------|-----------|
| O(3)#3-Pb(1)-O(2)#6   | 62.21(4)  | O(2)#12-Ti(1)-O(3)#14 | 179.0(4)  |
| O(2)#4-Pb(1)-O(2)#6   | 118.33(5) | O(3)#13-Ti(1)-O(3)#14 | 92.3(4)   |
| O(2)#5-Pb(1)-O(2)#6   | 118.33(5) | O(2)#10-Ti(1)-O(3)    | 179.0(4)  |
| O(2)#10-Te(1)-O(2)#11 | 90.9(3)   | O(2)#11-Ti(1)-O(3)    | 88.41(18) |
| O(2)#10-Te(1)-O(2)#12 | 90.9(3)   | O(2)#12-Ti(1)-O(3)    | 88.41(18) |
| O(2)#11-Te(1)-O(2)#12 | 90.9(3)   | O(3)#13-Ti(1)-O(3)    | 92.3(4)   |
| O(2)#10-Te(1)-O(3)#13 | 88.41(18) | O(3)#14-Ti(1)-O(3)    | 92.3(4)   |

---

Symmetry transformations used to generate equivalent atoms:

- #1  $-y-1/2, z-5/2, -x+2$  #2  $z-5/2, -x, -y+3/2$  #3  $-x, -y-1/2, z-1/2$   
#4  $-y-1, z-2, -x+2$  #5  $-x, -y-1, z$  #6  $z-2, -x, -y+1$   
#7  $-x-1/2, -y-1/2, z$  #8  $x, -y-1/2, -z+7/2$  #9  $-x-1/2, y, -z+7/2$   
#10  $y+1/2, z-2, x+3/2$  #11  $z-3/2, -x, -y+3/2$  #12  $-x+1/2, -y-1/2, z$   
#13  $-y, z-2, -x+2$  #14  $z-2, -x, -y+2$  #15  $x, -y-1, -z+3$   
#16  $-x-1, y, -z+3$  #17  $-x-1, -y-1, z$  #18  $x+1/2, -y-1, -z+7/2$   
#19  $x, -y, -z+4$  #20  $-x, -y-1/2, z+1/2$  #21  $-x, y+1/2, -z+7/2$

**Table S3** Atomic coordinates ( $\times 10^4$ ) and equivalent isotropic displacement parameters ( $\text{\AA}^2 \times 10^3$ ) as well as atomic occupancy factors for  $\text{Pb}_4\text{Ti}_3\text{TeO}_{13}$ .  $U_{eq}$  is defined as one-third of the trace of the orthogonalized  $U_{ij}$  tensor, and the bond valence sum for each atom in asymmetric unit.

|              | x        | y        | z        | $U_{eq}$ | BVS   | OCC  |
|--------------|----------|----------|----------|----------|-------|------|
| <b>Pb(1)</b> | -3726(1) | -3726(1) | 16274(1) | 19(1)    | 2.079 | 1    |
| <b>Te(1)</b> | 1250(3)  | -1250(3) | 18750(3) | 6(1)     | 4.442 | 0.25 |
| <b>Ti(1)</b> | 1250(3)  | -1250(3) | 18750(3) | 6(1)     |       | 0.75 |
| <b>O(1)</b>  | -5000    | -5000    | 15000    | 17(4)    | 2.519 | 1    |
| <b>O(2)</b>  | 2500     | -4397(7) | 17500    | 8(1)     | 1.87  | 1    |
| <b>O(3)</b>  | 1932(7)  | 0        | 20000    | 7(1)     | 1.84  | 1    |

**Table S4** Anisotropic displacement parameters ( $\text{\AA}^2 \times 10^3$ ) for  $\text{Pb}_4\text{Ti}_3\text{TeO}_{13}$ .

|              | $U^{11}$ | $U^{22}$ | $U^{33}$ | $U^{23}$ | $U^{13}$ | $U^{12}$ |
|--------------|----------|----------|----------|----------|----------|----------|
| <b>Pb(1)</b> | 19(1)    | 19(1)    | 19(1)    | -3(1)    | -3(1)    | -3(1)    |
| <b>Te(1)</b> | 6(1)     | 6(1)     | 6(1)     | 0(1)     | 0(1)     | 0(1)     |
| <b>Ti(1)</b> | 6(1)     | 6(1)     | 6(1)     | 0(1)     | 0(1)     | 0(1)     |
| <b>O(1)</b>  | 17(4)    | 17(4)    | 17(4)    | 0        | 0        | 0        |
| <b>O(2)</b>  | 8(1)     | 7(2)     | 8(1)     | 0        | -1(1)    | 0        |
| <b>O(3)</b>  | 7(2)     | 7(1)     | 7(1)     | 0(1)     | 0        | 0        |

**Table S5** The calculated “flexibility index”  $F$  of  $\text{Pb}_4\text{Ti}_3\text{TeO}_{13}$  and  $\text{Li}_2\text{ZrTeO}_6$ .

|                             | M-O<br>( $R_\theta$ ) | M-O<br>( $R_a$ ) | $\exp[(R_\theta - R_a)/B]$ | $C_a$<br>(M) | $C_b$<br>(O) | $\frac{(\sqrt{C_a} + \sqrt{C_b})^2}{R_a^2}$ | $F$   |
|-----------------------------|-----------------------|------------------|----------------------------|--------------|--------------|---------------------------------------------|-------|
| PTTO                        | 1.815<br>(Ti-O)       | 1.955            | 0.686                      | 4            | 6            | 5.182                                       | 0.132 |
| $\text{Li}_2\text{ZrTeO}_6$ | 1.937<br>(Zr-O)       | 2.090            | 0.661                      | 4            | 6            | 4.532                                       | 0.146 |

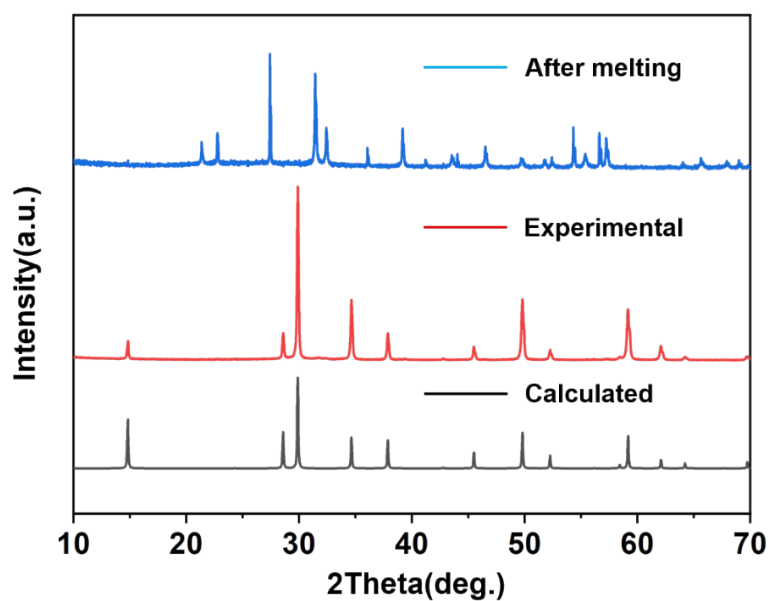

**Fig. S1** PXR D curves of the initial and melted  $\text{Pb}_4\text{Ti}_3\text{TeO}_{13}$  compound compared with the corresponding calculated data.

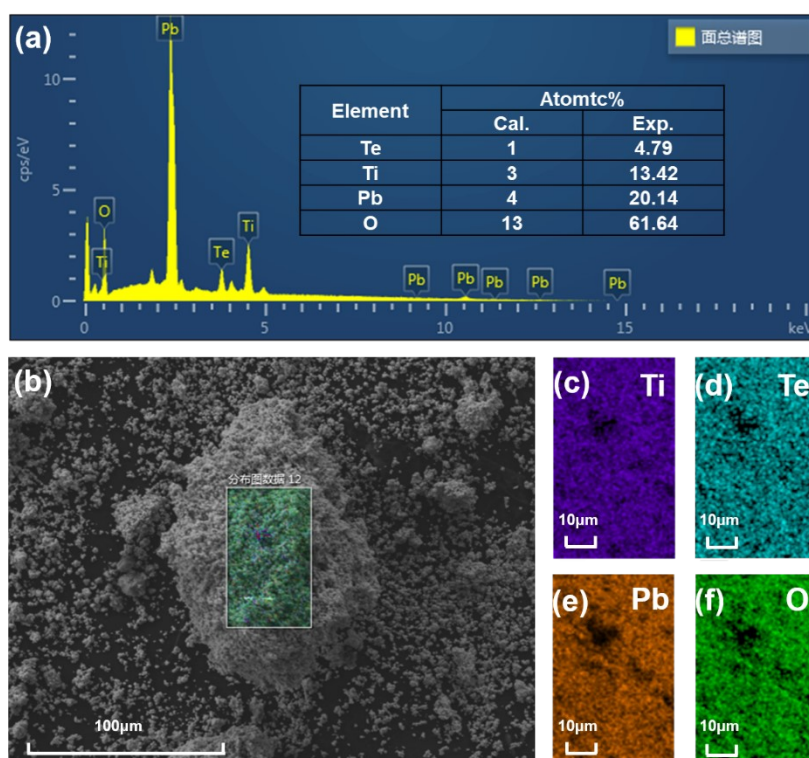

**Fig. S2** EDS of  $\text{Pb}_4\text{Ti}_3\text{TeO}_{13}$  (a) Atomic ratio of various elements, (b) Surface morphology, (c–f) Ti, Te, Pb and O mapping results, respectively.



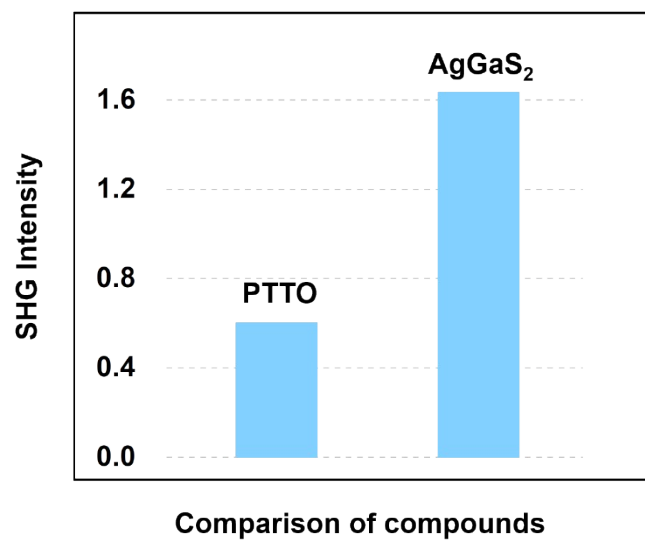

**Fig. S3** SHG intensity comparison of  $\text{Pb}_4\text{Ti}_3\text{TeO}_{13}$  with the  $\text{AgGaS}_2$  reference at  $2 \mu\text{m}$ .
